# Supplementary material
Source: Springer Nature journal article supplement (https://www.springermedizin.de/resource/supplementary/12906_2011_487_MOESM7_ESM.pdf/9520306)

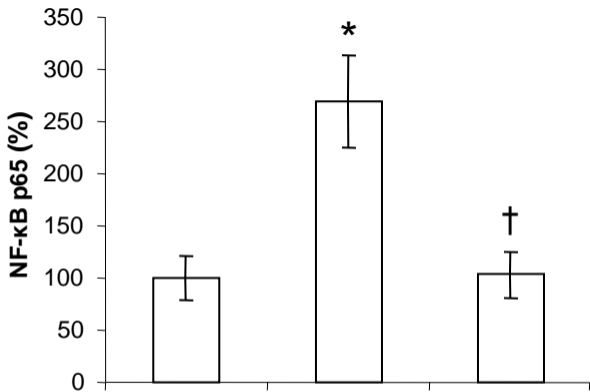

***C. albicans* (MOI=15)**

-

+

+

**AC-PACs (50 μg/ml)**

-

-

+

Supplement: MOESM7 [file 9520306]
